# Supplementary material
Source: publisher site journal article supplement (https://www.spandidos-publications.com/2064/downloadSupplementary)
Supplement: Supplementary file 1 [file downloadSupplementary]

## Sheet: Sheet1
Table SII. The proteomic profile of oral cancer cell-derived exosomes analyzed by mass spectrometry (filtered for unique peptides ≥ 2).
WSU-HN4 exosomes		SCC-9 exosomes		Venny analysis
Gene symbol	Unique peptides	Gene symbol	Unique peptides	Gene symbol
ATP1B1	2	SNRNP200	2	ATP1B1
SYPL1	2	VPS37C	2	MYO1B
CPNE1	2	ITGB6	2	ALDH1A3
MYO1B	2	VPS4B	2	ALPP
ALDH1A3	2	C1QBP	2	ALPPL2
ALPP	2	NT5C2	2	HMGB1
ALPPL2	2	EIF4A2	2	FSCN1
HMGB1	2	EIF4A1	2	CLDN4
HMGB1P1	2	EHD4	2	CLDN3
SP100	2	SFRP1	2	CLDN6
FSCN1	2	RPL7	2	CLDN9
CLDN4	2	LDHB	2	VAT1
CLDN3	2	NACA	2	MVP
CLDN6	2	ALDH1A3	2	ST13
CLDN9	2	TPP1	2	BST2
TIMP3	2	ST14	2	LAMP2
VAT1	2	KPNB1	2	CTSA
TMBIM1	2	GPR56	2	MAP4K4
MVP	2	CLDN4	2	TMPRSS4
CHMP1A	2	CLDN3	2	GLB1
ST13	2	CLDN6	2	CDH13
BST2	2	CLDN9	2	PSCA
LAMP2	2	PPP1CC	2	CLDN7
CTSA	2	PPP1CA	2	DSTN
TSPAN9	2	PPP1CB	2	TNFRSF11B
MAP4K4	2	ANXA4	2	KLK10
TMPRSS4	2	SQSTM1	2	MPZL2
GLB1	2	NCSTN	2	RPLP2
CDH13	2	PSMD2	2	NPM1
PSCA	2	VAT1	2	CNP
CLDN7	2	NPC2	2	ANXA3
DSTN	2	LAMP2	2	MARCKSL1
IGF2BP2	2	CSNK2A1	2	GNG5
TNFRSF11B	2	TMPRSS4	2	PACSIN2
PLXNB2	2	GLB1	2	SLC37A2
KLK10	2	MYL6	2	GLG1
MPZL2	2	MYL6B	2	FAM129B
UGDH	2	CDH13	2	CHMP5
RPLP2	2	PODXL	2	EIF4A2
NPM1	2	GSTP1	2	EIF4A1
CNP	2	S100A10	2	TSPAN4
ANXA3	2	PSCA	2	ST14
MARCKSL1	2	PAIP1	2	GPR56
RAB10	2	RPS3	2	PPP1CC
GNG5	2	CLDN7	2	PPP1CA
RHOG	2	LAMB1	2	PPP1CB
PACSIN2	2	RPL19	2	BSG
MINK1	2	VWA1	2	TPI1
SLC37A2	2	ACP5	2	GSTP1
GLG1	2	TNFRSF11B	2	PLSCR3
NEDD4L	2	B4GALT5	2	MDK
NEDD4	2	MPZL2	2	GPC1
FAM129B	2	CREG1	2	HSPB1
CHMP5	2	NTN1	2	APP
CD2AP	2	CLTB	2	SERPINE1
EIF4A2	3	CNP	2	PFN1
EIF4A1	3	CEACAM1	2	CEACAM1
TSPAN4	3	SDC1	2	F3
ST14	3	NAMPT	2	RAP1B
GPR56	3	MARCKSL1	2	RAP1A
PPP1CC	3	EPHB4	2	YWHAE
PPP1CA	3	EPHB3	2	TLN1
PPP1CB	3	VCP	2	FAM49B
BSG	3	FKBP1A	2	TMEM106B
TPI1	2	GNG5	2	S100A16
CNDP2	3	EEF1A2	2	ITCH
GSTP1	3	ITM2B	2	CDCP1
PLSCR3	3	FAM49B	2	SCPEP1
MDK	3	SLC37A2	2	GNG12
GPC1	3	S100A16	2	IQGAP1
CHMP2A	3	ITCH	2	MUC1
HSPB1	3	VTA1	2	FAM125A
APP	3	CHMP5	2	ITGB6
SERPINE1	3	CLDN1	3	RPLP0
PFN1	3	SLC38A2	2	GPRC5A
CEACAM1	3	TSPAN4	3	CALM2
F3	3	NAP1L4	3	CALM1
MSN	3	GNB1	2	CALM3
RAP1B	3	LAMP1	2	LCN2
RAP1A	3	P4HB	2	LAMP1
YWHAE	3	LSR	3	CTNNB1
TLN1	3	HNRNPK	3	PCBP2
FAM49B	3	MVP	3	ITGA3
TMEM106B	3	CDC42	2	F11R
S100A16	3	PPGB	3	BROX
ITCH	3	CTSA	3	MYOF
CDCP1	3	RAN	3	CD59
SCPEP1	2	MAP4K4	2	APOBEC3G
GNG12	3	RRAS2	2	RALA
RAP2C	2	MDK	3	EDIL3
RAP2A	2	APOBEC3G	3	S100A6
IQGAP1	4	ALCAM	3	AKR1B1
MUC1	4	DSTN	3	ITGA2
FAM125A	4	TXN	3	SDC1
ITGB6	3	SLC16A3	3	SLC1A3
RPLP0	4	KLK10	3	CD47
RPLP0P6	4	RPLP2	3	SCARB2
GPRC5A	3	S100A6	3	ARRDC1
CHMP1B	3	F3	3	S100A14
CALM2	4	AKR1B1	3	VPS37C
CALM1	4	FASN	3	CLDN1
CALM3	4	EIF5	2	ANXA4
LCN2	3	CD47	3	CDC42
NGAL	3	ANP32B	3	CDH1
LAMP1	2	TLN1	3	CLIC1
CTNNB1	4	SLC44A1	3	FTH1
PCBP2	4	GLG1	3	MARCKS
ITGA3	4	IGSF8	3	S100A11
F11R	4	FAM129B	3	RAB5C
BROX	4	S100A14	3	PLAUR
MYOF	4	GNG12	2	LAMC2
RAB1A	3	ATP1B1	4	PLEC
RAB1B	3	SYPL1	3	TSPAN14
RAB1C	3	IQGAP1	4	SLC44A1
CD59	2	FAM125A	4	TINAGL1
APOBEC3G	4	HNRNPC	3	CD9
RALA	2	HNRNPCL1	3	CD55
APOBEC3C	2	MYO1B	4	TSPAN6
EDIL3	4	EPHB2	4	SLC2A1
S100A6	3	CD55	4	PLAT
AKR1B1	4	HMGB1	2	PACSIN3
ITGA2	4	SLC2A1	3	B2M
SDC1	3	SERPINE2	3	CTNND1
SLC1A3	4	BSG	3	CD151
CD47	3	ST13	4	ALCAM
SCARB2	4	ST13P4	4	SLC16A3
ARRDC1	4	ST13P5	4	GNAI2
S100A14	4	BST2	3	ISG15
VPS37C	4	LTBP3	4	ICAM1
CLDN1	3	MYOF	4	YWHAQ
ANXA4	4	CD63	3	SDC4
CDC42	3	PLSCR3	4	YWHAB
CDH1	3	CDH1	4	SFN
CLIC1	5	CD151	3	ARF3
FTH1	5	CD59	2	ARF1
MARCKS	4	RALA	2	ARF5
S100A11	4	CLIC1	4	RHOA
RAB5C	2	ALDOA	4	RHOC
PLAUR	4	ANXA3	4	IFITM3
LAMC2	5	YWHAQ	4	SLC7A5
PLEC	4	SLC1A3	4	CAV1
TSPAN14	5	RAB5C	3	SLC44A2
SLC44A1	4	RAP1B	4	ITGAV
TINAGL1	5	RAP1A	4	CD44
CD9	3	GNAS	4	CD63
CD55	6	GSA	4	IGF2BP3
TSPAN6	5	SLC7A5	4	ALDOA
SLC2A1	4	PLAUR	3	ANXA5
PLAT	5	ARRDC1	4	DNAJA1
PACSIN3	4	PACSIN2	4	TAGLN2
B2M	3	SLC44A2	3	GNB2
CTNND1	5	TSPAN14	4	HSPG2
CD151	3	SDCBP2	3	LAMB3
ALCAM	6	MUC1	5	HIST2H2AA3
SLC16A3	5	CD9	3	HIST2H2AC
GNAI2	4	CD44	5	H2AFX
ISG15	5	GGH	5	HIST1H2AA
ICAM1	5	PPM1G	5	HIST1H2AK
YWHAQ	5	ALPP	4	HIST1H2AB
SDC4	6	ALPPL2	4	HIST1H2AG
YWHAB	3	CALM2	5	HIST1H2AD
SFN	5	CALM1	5	HIST3H2A
ARF3	3	CALM3	5	HIST1H2AC
ARF1	3	NAP1L1	4	H2AFJ
ARF5	3	TSPAN6	5	HIST1H2AH
RHOA	5	FSCN1	5	HIST1H2AJ
RHOC	5	PCBP2	5	HIST2H2AB
IFITM3	2	RANGAP1	5	H2AFZ
SLC7A5	5	ITGA3	4	H2AFV
CAV1	4	F11R	5	DIP2B
SLC44A2	5	BROX	4	IST1
ITGAV	5	PTMA	5	EPHA2
CD44	6	CTSH	4	PLSCR1
CD63	2	LAMC1	4	YBX1
IGF2BP3	7	S100A11	5	EEF2
ALDOA	6	ARF3	3	RAB7A
ANXA5	6	ARF1	3	PCBP1
DNAJA1	6	ARF5	3	VPS28
TAGLN2	6	GNB2	2	IGSF8
GNB2	3	ANP32E	5	SDCBP2
HSPG2	6	TMEM106B	4	PLAU
LAMB3	7	GPRC5A	4	STOM
HIST2H2AA3	4	PLAU	6	DNAJA2
HIST2H2AC	4	PACSIN3	5	RAC1
H2AFX	4	B2M	3	RAC3
HIST1H2AA	4	TGFB1	6	EGFR
HIST1H2AK	4	YBX1	4	PPIA
HIST1H2AB	4	IGF2BP3	5	HIST1H4L
HIST1H2AG	4	LAMA5	6	HIST1H4A
HIST1H2AD	4	EDIL3	6	HIST1H4H
HIST3H2A	4	SERPINE1	6	YWHAG
HIST1H2AC	4	PFN1	5	EPCAM
H2AFJ	4	ITGA2	6	TGFB1
HIST1H2AH	4	YWHAB	4	LDHA
HIST1H2AJ	4	SFN	4	JUP
HIST2H2AB	4	SSRP1	6	TNFAIP2
H2AFZ	4	SCARB2	6	PXDN
H2AFV	4	PCBP1	5	VPS37B
DIP2B	7	CD109	6	PSAP
IST1	7	PROM2	6	HSP90AB1
EPHA2	5	CDCP1	6	ENO1
PLSCR1	6	EGFR	7	CFL1
TUBB	2	PPIA	4	PROM2
TUBB2A	2	RPLP0	7	HIST2H2BF
TUBB2B	2	IST1	4	HIST1H2BF
YBX1	5	LCN2	5	HIST1H2BK
EEF2	8	PLSCR1	6	H2BFS
RAB7A	8	TPI1	7	HIST1H2BD
PCBP1	5	ACTN1	2	HIST1H2BC
VPS28	8	TNC	7	HIST1H2BH
IGSF8	7	ADAM10	7	HIST1H2BN
SDCBP2	6	DNAJA2	7	HIST1H2BM
PLAU	8	HSPB1	7	HIST1H2BL
STOM	9	ISG15	6	HIST1H2BJ
DNAJA2	9	ICAM1	7	HIST1H2BO
RAC1	3	FST	7	HIST1H2BB
RAC3	3	CFL1	7	HIST2H2BE
EGFR	9	MARCKS	5	HIST1H2BA
PPIA	4	SDC4	7	HIST3H2BB
HIST1H4L	5	DNAJA1	6	COL12A1
HIST1H4A	5	RHOA	6	MUC4
HIST1H4H	5	RHOC	6	AGRN
YWHAG	7	YWHAE	6	CHMP4B
EPCAM	8	CAV1	5	UBC
TGFB1	8	LAMC2	7	UBB
LDHA	8	RAC1	2	RPS27A
JUP	3	RAC3	2	UBA52
TNFAIP2	9	CD81	4	ANXA11
PXDN	9	IGFBP3	8	EZR
VPS37B	8	GNS	7	YWHAZ
PSAP	6	CTNNB1	7	ITGB1
HSP90AB1	8	EPCAM	7	CD109
ENO1	9	GNAI2	5	CD81
CFL1	7	ANXA5	8	LAMA3
PROM2	9	TAGLN2	5	EHD1
HIST2H2BF	4	IFITM3	3	ADAM10
HIST1H2BF	4	HIST2H2AA3	4	PKM2
HIST1H2BK	4	HIST2H2AC	4	SDCBP
H2BFS	4	H2AFX	4	GAPDH
HIST1H2BD	4	HIST1H2AA	4	ATP1A1
HIST1H2BC	4	HIST1H2AK	4	MFI2
HIST1H2BH	4	HIST1H2AB	4	SH3GL1
HIST1H2BN	4	HIST1H2AG	4	HSP90AA1
HIST1H2BM	4	HIST1H2AD	4	ANXA1
HIST1H2BL	4	HIST3H2A	4	TTYH3
HIST1H2BJ	4	HIST1H2AC	4	PDCD6
HIST1H2BO	4	H2AFJ	4	PABPC1
HIST1H2BB	4	HIST1H2AH	4	CD82
HIST2H2BE	4	HIST1H2AJ	4	SLC3A2
HIST1H2BA	4	HIST2H2AB	4	PTGFRN
HIST3H2BB	4	H2AFZ	4	CTSD
COL12A1	12	H2AFV	4	NT5E
MUC4	11	DIP2B	8	ITGA6
AGRN	11	ITGAV	8	CTNNA1
CHMP4B	10	PLAT	7	LGALS3BP
UBC	4	CTNND1	6	EEF1A1
UBB	4	ENO1	9	EEF1A1P5
RPS27A	4	HSPA5	9	ANXA2
UBA52	4	CALR	7	ANXA2P2
ANXA11	11	MYH9	9	MFGE8
EZR	8	VPS28	9	HSPA1A
YWHAZ	6	VPS37B	8	HSPA8
ITGB1	10	SCPEP1	3	C3
CD109	11	UBC	4	ITGB4
CD81	4	UBB	4	FN1
LAMA3	14	RPS27A	4	PDCD6IP
EHD1	13	UBA52	4	CLTC
TSG101	3	HIST2H2BF	4
ADAM10	12	HIST1H2BF	4
PKM2	11	HIST1H2BK	4
SDCBP	2	H2BFS	4
GAPDH	6	HIST1H2BD	4
ATP1A1	14	HIST1H2BC	4
MFI2	12	HIST1H2BH	4
SH3GL1	11	HIST1H2BN	4
HSP90AA1	7	HIST1H2BM	4
ANXA1	11	HIST1H2BL	4
TTYH3	10	HIST1H2BJ	4
PDCD6	7	HIST1H2BO	4
PABPC1	9	HIST1H2BB	4
CD82	6	HIST2H2BE	4
SLC3A2	15	HIST1H2BA	4
PTGFRN	15	HIST3H2BB	4
CTSD	13	YWHAG	7
NT5E	13	PDCD6	7
ITGA6	21	ITGB1	9
CTNNA1	15	EEF2	10
LGALS3BP	15	CD82	6
EEF1A1	8	TINAGL1	8
EEF1A1P5	8	CAND1	9
EEF1A1L14	8	EPHA2	7
ANXA2	18	ANXA11	10
ANXA2P2	18	EZR	6
MFGE8	15	YWHAZ	8
HSPA1A	11	ANP32A	7
HSPA8	17	TNFAIP2	10
C3	33	CHMP4B	9
ITGB4	37	STOM	11
FN1	36	LDHA	8
PDCD6IP	10	JUP	6
CLTC	46	LAMB3	10
		SH3GL1	10
		TTYH3	10
		HIST1H4L	6
		HIST1H4A	6
		HIST1H4H	6
		FTH1	8
		MFI2	13
		PABPC1	8
		RAB7A	10
		MUC4	13
		GPC1	11
		SDCBP	2
		HSP90B1	14
		PXDN	14
		SUPT16H	14
		LAMA3	15
		EHD1	12
		COL12A1	15
		ANXA1	12
		NPM1	9
		CTSD	12
		PKM2	13
		PSAP	14
		NT5E	12
		IPO7	11
		ATP1A1	15
		PLEC	16
		PTGFRN	15
		GAPDH	6
		SLC3A2	16
		GAS6	18
		HSP90AB1	12
		ITGA6	23
		PDIA4	20
		HSPA1A	9
		ANXA2	19
		ANXA2P2	19
		CTNNA1	18
		HSPA8	15
		EEF1A1	8
		EEF1A1P5	8
		APLP2	17
		LGALS3BP	13
		MFGE8	17
		COL7A1	32
		ITGB4	38
		HSP90AA1	21
		HSPG2	42
		APP	21
		PDCD6IP	11
		C3	40
		CLTC	46
		FN1	47
		AGRN	51
